# Supplementary material
Source: PubMed Central journal article supplement (PMC8087183)
Supplement: NIHMS1671962-supplement-1671962_SourceData_ExtData_Fig7_Westren.pdf [file NIHMS1671962-supplement-1671962_SourceData_ExtData_Fig7_Westren.pdf]

# Extended Data Fig. 7d,e

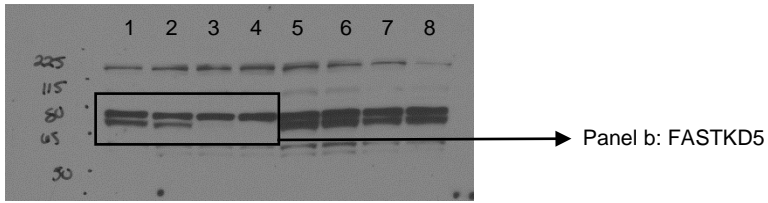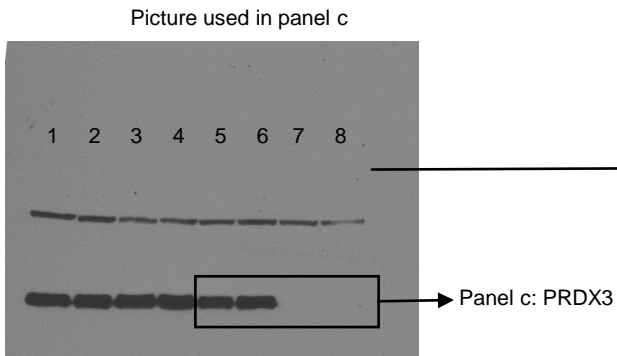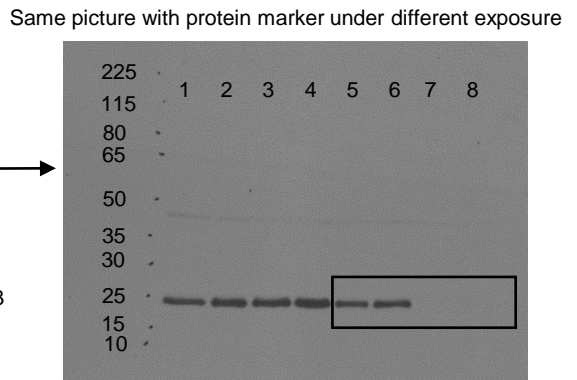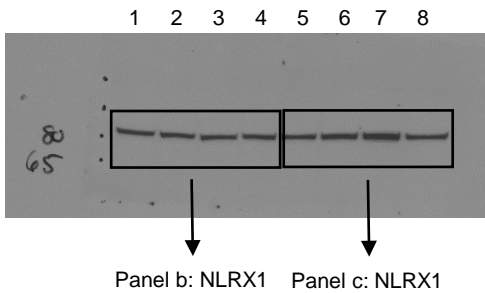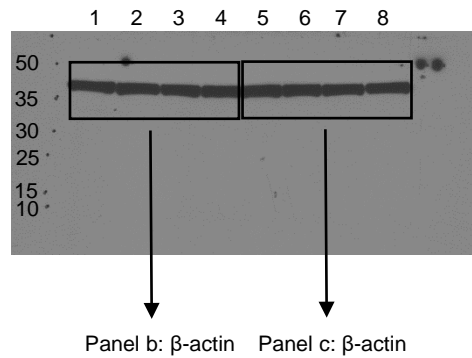

1. sh-FASTKD5#1 dox -
2. sh-FASTKD5#2 dox -
3. sh-FASTKD5#1 dox +
4. sh-FASTKD5#2 dox +
5. sh-PRDX3#1 dox -
6. sh-PRDX3#2 dox -
7. sh-PRDX3#1 dox +
8. sh-PRDX3#2 dox +
